# Supplementary material
Source: PubMed Central journal article supplement (PMC4393795)
Supplement: NIHMS667550-supplement-Supplement.pdf [file NIHMS667550-supplement-Supplement.pdf]

Supplementary figure 1: Proportion of Colombian population covered by health insurance according to different schemes

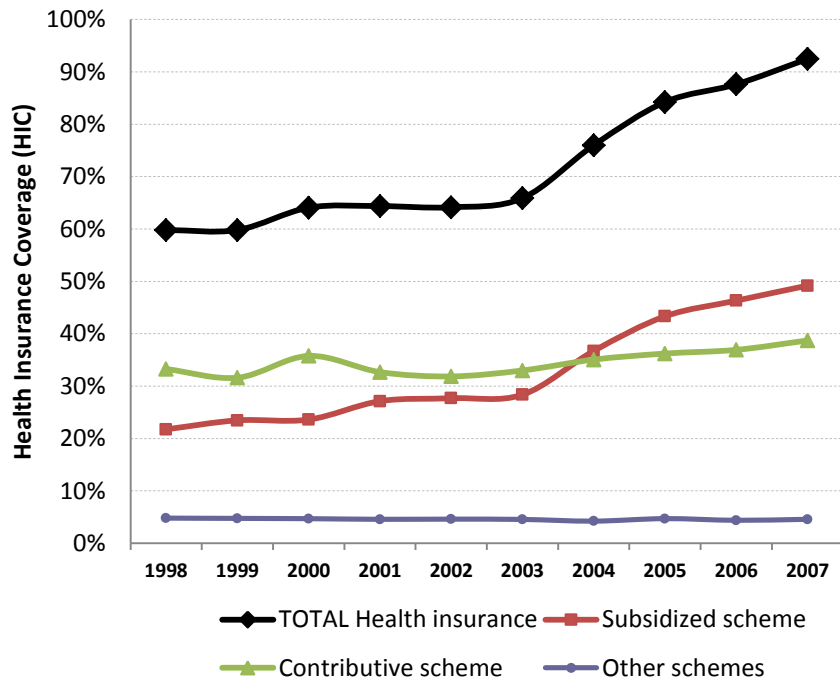

Supplementary figure 2:

Comparisons of time trends in educational level in Colombia based on different sources

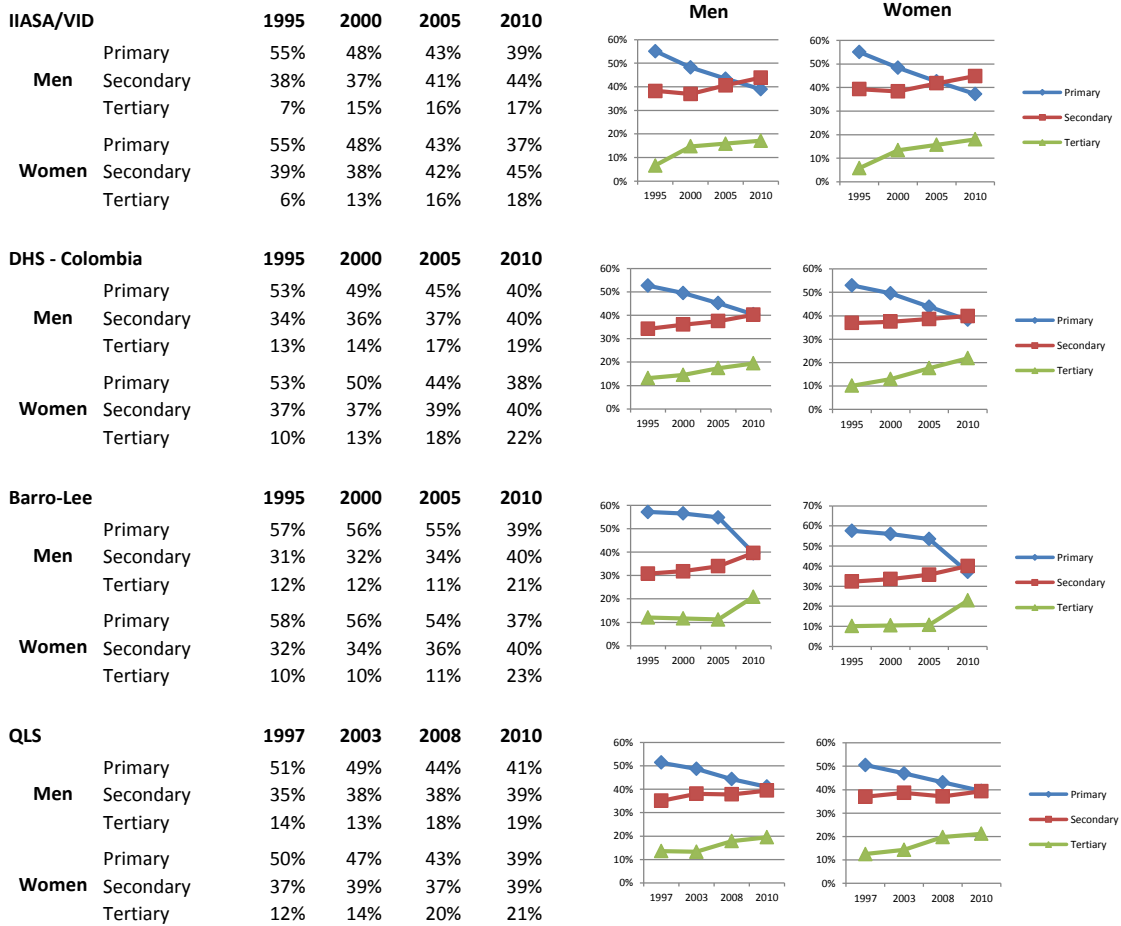

Sources:

IIASA/VID: International Institute for Applied Systems Analysis (IIASA), Austria, the Vienna Institute of Demography, Austria:

World Population Program; <http://datatopics.worldbank.org/education/wProjQuery/IIASModel.aspx>

DHS: Demographic Health Survey - Encuesta Nacional de Demografía y Salud.

Profamilia: <http://www.profamilia.org.co/encuestas/Profamilia/Profamilia/>

Barro-Lee: Barro RJ, Lee JW. A new data set of educational attainment in the world, 1950-2010. J Developm Econ 2013: 104: pp 184-198

QLS: Quality of Life Survey (Encuesta de Calidad de Vida (ECV)): <http://www.dane.gov.co/index.php/estadisticas-sociales/calidad-de-vida-ecv>

Supplementary table 1. Estimates for the RR for the interaction term of RII\*Year with corresponding confidence intervals

| Relative Index of Inequality * Year | MEN   |              | WOMEN |              |
|-------------------------------------|-------|--------------|-------|--------------|
|                                     | RR    | 95% CI       | RR    | 95% CI       |
| All cancers                         | 1.01* | (1.00; 1.03) | 0.99  | (0.98; 1.00) |
| Stomach cancer                      | 1.01  | (0.97; 1.04) | 1.00  | (0.96; 1.04) |
| Cervical cancer                     |       |              | 0.98  | (0.95; 1.02) |
| Prostate cancer                     | 1.02  | (0.97; 1.08) |       |              |
| Lung cancer                         | 1.03  | (1.00; 1.07) | 0.99  | (0.95; 1.04) |
| Colorectal cancer                   | 1.06* | (1.01; 1.11) | 1.02  | (0.97; 1.07) |
| Breast cancer                       |       |              | 1.02  | (0.99; 1.04) |
| Other Cancers                       | 1.01  | (0.99; 1.03) | 1.00  | (0.98; 1.02) |

\* indicates statistically significant interaction of RII with year at  $p < 0.05$

95% CI: 95% Confidence interval
